# Supplementary material for: The Effect of A2 Milk on Gastrointestinal Symptoms in Comparison to A1/A2 Milk: A Single-center, Randomized, Double-blind, Cross-over Study
Source: PubMed Central journal article supplement — J Cancer Prev. 2024 Jun 30;29(2):45–53. doi: 10.15430/JCP.24.007 (PMC11215337; doi:10.15430/jcp.24.007), 2024-06-30
Supplement: jcp-29-2-45-supple.pdf [file jcp-29-2-45-supple.pdf]

**Table S1.** Questionnaire for digestive symptoms (please rate the following symptoms on a 0–3 scale)

| Symptom category      | Definition                                                                   | Score                                                     |
|-----------------------|------------------------------------------------------------------------------|-----------------------------------------------------------|
| Bloating              | Swelling often associated with a sensation of gas or air in the stomach      | 0: never<br>1: rarely<br>2: frequently<br>3: all the time |
| Burping               | Bringing up air or gas from the stomach via the mouth                        | 0: never<br>1: rarely<br>2: frequently<br>3: all the time |
| Postprandial distress | Discomfort after eating                                                      | 0: never<br>1: rarely<br>2: frequently<br>3: all the time |
| Abdominal pain        | Pain or discomfort of the abdomen                                            | 0: never<br>1: rarely<br>2: frequently<br>3: all the time |
| Rumbling              | Vibrations or noise in the stomach                                           | 0: never<br>1: rarely<br>2: frequently<br>3: all the time |
| Borborygmus           | Continuous low sound made by the movement of liquid and gas in the intestine | 0: never<br>1: rarely<br>2: frequently<br>3: all the time |
| Fecal urgency         | Urgent need to go to the toilet                                              | 0: never<br>1: rarely<br>2: frequently<br>3: all the time |

**Table S2.** Laboratory tests before and after milk consumption

|          | A2 milk        |                   |                              | A1/A2 milk |                   |                              | <i>P</i> -value <sup>b</sup> |        |
|----------|----------------|-------------------|------------------------------|------------|-------------------|------------------------------|------------------------------|--------|
|          | Before         | After             | <i>P</i> -value <sup>a</sup> | Before     | After             | <i>P</i> -value <sup>a</sup> |                              |        |
| Period 1 | hs-CRP (mg/dL) | 0.08 ± 0.09       | 0.10 ± 0.11                  | 0.337      | 0.10 ± 0.24       | 0.10 ± 0.10                  | 0.096                        | 0.729  |
|          | IL-4 (pg/mL)   | 0.25 ± 0.00       | 0.25 ± 0.00                  |            | 0.25 ± 0.00       | 0.25 ± 0.00                  |                              | >0.999 |
|          | IgG (mg/dL)    | 1,224.76 ± 212.04 | 1,251.88 ± 225.62            | 0.063      | 1,138.56 ± 172.65 | 1,151.11 ± 173.74            | 0.124                        | 0.360  |
|          | IgG1 (mg/dL)   | 636.57 ± 173.94   | 650.00 ± 160.76              | 0.122      | 601.93 ± 122.05   | 606.13 ± 131.94              | 0.364                        | 0.334  |
|          | IgE (U/dL)     | 143.65 ± 430.77   | 150.09 ± 444.53              | 0.048      | 140.17 ± 181.79   | 143.69 ± 178.12.             | 0.540                        | 0.409  |
|          | BCM-7 (ug/mL)  | 1.34 ± 1.19       | 1.52 ± 1.38                  | >0.999     | 1.67 ± 1.82       | 1.83 ± 1.75                  | 0.275                        | 0.503  |
| Period 2 | hs-CRP (mg/dL) | 0.07 ± 0.09       | 0.06 ± 0.06                  | 0.959      | 0.08 ± 0.11       | 0.06 ± 0.06                  | 0.297                        | 0.484  |
|          | IL-4 (pg/mL)   | 0.25 ± 0.00       | 0.25 ± 0.00                  |            | 0.25 ± 0.00       | 0.34 ± 0.37                  | >0.999                       | 0.331  |
|          | IgG (mg/dL)    | 1,147.94 ± 190.03 | 1,156.56 ± 193.27            | 0.466      | 1,245.24 ± 197.78 | 1,257.41 ± 214.43            | 0.686                        | >0.999 |
|          | IgG1 (mg/dL)   | 606.94 ± 133.73   | 616.39 ± 135.64              | 0.249      | 651.85 ± 165.75   | 655.65 ± 176.93              | 0.645                        | 0.621  |
|          | IgE (U/dL)     | 141.32 ± 174.85   | 141.45 ± 160.96              | 0.248      | 144.36 ± 429.40   | 142.86 ± 426.51              | 0.850                        | 0.248  |
|          | BCM-7 (ug/mL)  | 1.75 ± 1.61       | 1.98 ± 1.54                  | 0.171      | 1.35 ± 1.17       | 1.53 ± 1.12                  | 0.314                        | 0.826  |

Values are presented as mean ± standard deviation. Per protocol analysis. Period 1, the consumption period for the first intervention milk; Period 2, the consumption period for the second intervention milk. *P*-values were calculated using <sup>a</sup>paired *t*-test or Wilcoxon signed rank test, <sup>b</sup>two sample *t*-test or Wilcoxon signed rank test.
